# Supplementary material
Source: PubMed Central journal article supplement (PMC4973204)
Supplement: SD9.pdf [file SD9.pdf]

SUPPLEMENTAL TABLE 1

Normal and elevated values of three clinically relevant transferases (aspartate transaminase, alanine transaminase, and gamma-glutamyl transferase) induced by imported infectious diseases among 14,559 diseased German travelers returning from the tropics and subtropics (cases)

| Class                                  | Transferases (EC 2)      |             |                  |           |                          |                            |                  |             |                                  |             | Proportion among cases or controls (%) |                           |                                     |
|----------------------------------------|--------------------------|-------------|------------------|-----------|--------------------------|----------------------------|------------------|-------------|----------------------------------|-------------|----------------------------------------|---------------------------|-------------------------------------|
|                                        | Transaminases (EC 2.6.1) |             |                  |           |                          | Acytransferases (EC 2.6.3) |                  |             |                                  |             |                                        |                           |                                     |
|                                        | AST (EC 2.6.1.1)         |             | ALT (EC 2.6.1.2) |           | Transaminases (EC 2.6.1) |                            | GGT (EC 2.3.2.2) |             | Aminoacyltransferases (EC 2.3.2) |             |                                        |                           |                                     |
| Subclass                               | Sub-subclass             | Enzyme      | Values           | Normal    | Elevated                 | More than 2-fold elevated  | Normal           | Elevated    | More than 2-fold elevated        | Normal      | Elevated                               | More than 2-fold elevated | Total (%): Normal + elevated values |
| Cases and controls                     | Cases                    | %           | 13,428           | 1,131     | 274                      | 12,607                     | 1,952            | 518         | 13,099                           | 1,460       | 495                                    | 14,559                    | 100                                 |
|                                        | 95% CI                   |             | 92.23            | 7.77      | 1.88                     | 86.59                      | 13.41            | 3.56        | 89.97                            | 10.03       | 3.40                                   | 100                       |                                     |
|                                        | Controls                 | %           | 91,80-92.67      | 7.33-8.20 | 1.66-2.10                | 86.04-87.15                | 12.85-13.96      | 3.26-3.86   | 89.48-90.46                      | 9.54-10.52  | 3.11-3.69                              | 100                       |                                     |
|                                        | 95% CI                   |             | 1,475            | 61        | 6                        | 1,374                      | 162              | 23          | 1,361                            | 175         | 54                                     | 1,536                     | 100                                 |
|                                        | 95% CI                   |             | 96.03            | 3.97      | 0.39                     | 89.45                      | 10.55            | 1.50        | 88.61                            | 11.39       | 3.52                                   | 100                       |                                     |
| Demographic data of cases and controls |                          |             |                  |           |                          |                            |                  |             |                                  |             |                                        |                           |                                     |
| Sex                                    | Cases, females           | %           | 6,952            | 680       | 163                      | 6,730                      | 902              | 250         | 7,019                            | 613         | 205                                    | 7,632                     | 52.42                               |
|                                        | 95% CI                   |             | 91.09            | 8.91      | 2.14                     | 88.18                      | 11.82            | 3.28        | 91.97                            | 8.03        | 2.69                                   | 100                       |                                     |
|                                        | Controls, females        | %           | 551              | 32        | 4                        | 547                        | 36               | 10          | 540                              | 43          | 19                                     | 583                       | 37.96                               |
|                                        | 95% CI                   |             | 94.51            | 5.49      | 0.69                     | 93.83                      | 6.17             | 1.72        | 92.62                            | 7.38        | 3.26                                   | 100                       |                                     |
|                                        | Cases, males             | %           | 92,66-96.36      | 3.64-7.34 | 0.02-1.36                | 91.87-95.78                | 4.22-8.13        | 0.66-2.77   | 90.50-94.75                      | 5.25-9.50   | 1.82-4.70                              | 6,927                     | 47.58                               |
|                                        | 95% CI                   |             | 6,476            | 451       | 111                      | 5,877                      | 1,050            | 268         | 6,080                            | 847         | 290                                    | 6,927                     | 100                                 |
|                                        | Controls, males          | %           | 93.49            | 6.51      | 1.60                     | 84.84                      | 15.16            | 3.87        | 87.77                            | 12.23       | 4.19                                   | 100                       |                                     |
|                                        | 95% CI                   |             | 92.91-94.07      | 5.93-7.09 | 1.31-1.90                | 84.00-85.69                | 14.31-16.00      | 3.41-4.32   | 87.00-88.54                      | 11.46-13.00 | 3.71-4.66                              | 953                       | 62.04                               |
|                                        | 95% CI                   |             | 96.96            | 3.04      | 0.21                     | 86.78                      | 13.22            | 1.36        | 86.15                            | 13.85       | 3.67                                   | 100                       |                                     |
|                                        | 95% CI                   |             | 95.87-98.05      | 1.95-4.13 | 0-0.50                   | 84.63-88.93                | 11.07-15.37      | 0.63-2.10   | 83.96-88.34                      | 11.66-16.04 | 2.48-4.87                              | 684                       | 4.70                                |
| Age groups                             | Cases, 0-19 y            | %           | 637              | 47        | 19                       | 629                        | 55               | 22          | 638                              | 46          | 17                                     | 684                       | 4.70                                |
|                                        | 95% CI                   |             | 93.13            | 6.87      | 2.78                     | 91.96                      | 8.04             | 3.22        | 93.27                            | 6.73        | 2.49                                   | 100                       |                                     |
|                                        | Controls, 0-19 y         | %           | 91,23-95.02      | 4.98-8.77 | 1.55-4.01                | 89.92-94.00                | 6.00-10.08       | 1.89-4.54   | 91.40-95.15                      | 4.85-8.60   | 1.32-3.65                              | 126                       | 8.20                                |
|                                        | 95% CI                   |             | 121              | 5         | 1                        | 121                        | 5                | 1           | 125                              | 1           | 0                                      | 126                       |                                     |
|                                        | Cases, 20-64 y           | %           | 96.03            | 3.97      | 0.79                     | 96.03                      | 3.97             | 0.79        | 99.21                            | 0.79        | 0                                      | 100                       |                                     |
|                                        | 95% CI                   |             | 92.62-99.44      | 0.56-7.38 | 0-2.34                   | 92.62-99.44                | 0.56-7.38        | 0-2.34      | 97.66-100                        | 0-2.34      | NA                                     | 13,096                    | 89.95                               |
|                                        | Controls, 20-64 y        | %           | 12,082           | 1,014     | 244                      | 11,290                     | 1,806            | 473         | 11,821                           | 1,275       | 428                                    | 13,096                    | 100                                 |
|                                        | 95% CI                   |             | 92.26            | 7.74      | 1.86                     | 86.21                      | 13.79            | 3.61        | 90.26                            | 9.74        | 3.27                                   | 100                       |                                     |
|                                        | 95% CI                   |             | 91.80-92.71      | 7.29-8.20 | 1.63-2.09                | 85.62-86.80                | 13.20-14.38      | 3.29-3.93   | 89.76-90.77                      | 9.23-10.24  | 2.96-3.57                              | 1,325                     | 86.26                               |
|                                        | 95% CI                   |             | 1,274            | 51        | 4                        | 1,181                      | 144              | 21          | 1,179                            | 146         | 40                                     | 1,325                     | 100                                 |
| Cases, 65-92 y                         | %                        | 91.01       | 8.99             | 0.41      | 88.32                    | 11.68                      | 2.95             | 82.16       | 17.84                            | 6.42        | 779                                    | 5.35                      |                                     |
| 95% CI                                 |                          | 89.01-93.02 | 6.98-10.99       | 0.49-2.07 | 86.06-90.57              | 9.43-13.94                 | 1.76-4.14        | 79.47-84.85 | 15.15-20.53                      | 4.70-8.14   | 100                                    |                           |                                     |
| Controls, 65-92 y                      | %                        | 94.12       | 5.88             | 1.18      | 84.71                    | 15.29                      | 1.18             | 67.06       | 32.94                            | 16.47       | 85                                     | 5.53                      |                                     |
| 95% CI                                 |                          | 89.12-99.12 | 0.88-10.88       | 0-3.47    | 77.05-92.36              | 7.64-22.95                 | 0-3.47           | 57.07-77.05 | 22.95-42.93                      | 8.59-24.36  | 100                                    |                           |                                     |

(continued)

SUPPLEMENTAL TABLE 1  
Continued

| Class                     | Transferrases (EC 2)                                   |             |                              |                  |             |                              |                                  |             |                              |                  |          |                              | Total (%):<br>Normal +<br>elevated values | Proportion<br>among cases or<br>controls (%) |
|---------------------------|--------------------------------------------------------|-------------|------------------------------|------------------|-------------|------------------------------|----------------------------------|-------------|------------------------------|------------------|----------|------------------------------|-------------------------------------------|----------------------------------------------|
|                           | Transferrases transferring nitrogenous groups (EC 2.6) |             |                              |                  |             |                              | Acyltransferases (EC 2.3)        |             |                              |                  |          |                              |                                           |                                              |
|                           | AST (EC 2.6.1.1)                                       |             |                              | ALT (EC 2.6.1.2) |             |                              | Aminoacyltransferases (EC 2.3.2) |             |                              | GGT (EC 2.3.2.2) |          |                              |                                           |                                              |
|                           | Normal                                                 | Elevated    | More than<br>2-fold elevated | Normal           | Elevated    | More than<br>2-fold elevated | Normal                           | Elevated    | More than<br>2-fold elevated | Normal           | Elevated | More than<br>2-fold elevated |                                           |                                              |
| Travel data (only cases)  |                                                        |             |                              |                  |             |                              |                                  |             |                              |                  |          |                              |                                           |                                              |
| Travel duration           |                                                        |             |                              |                  |             |                              |                                  |             |                              |                  |          |                              |                                           |                                              |
| 1-14 days                 | 4,485                                                  | 339         | 81                           | 4,160            | 664         | 168                          | 4,272                            | 552         | 164                          | 4,824            | 33.13    |                              |                                           |                                              |
| %                         | 92.97                                                  | 7.03        | 1.68                         | 86.24            | 13.76       | 3.48                         | 88.56                            | 11.44       | 3.40                         | 100              |          |                              |                                           |                                              |
| 95% CI                    | 92.25-93.69                                            | 6.31-7.75   | 1.32-2.04                    | 85.26-87.21      | 12.79-14.74 | 2.97-4.00                    | 87.66-89.46                      | 10.54-12.34 | 2.89-3.91                    |                  |          |                              |                                           |                                              |
| 15-30 days                | 5,087                                                  | 469         | 111                          | 4,799            | 757         | 200                          | 4,967                            | 589         | 201                          | 5,556            | 38.16    |                              |                                           |                                              |
| %                         | 91.56                                                  | 8.44        | 2.00                         | 86.38            | 13.62       | 3.60                         | 89.40                            | 10.60       | 3.62                         | 100              |          |                              |                                           |                                              |
| 95% CI                    | 90.83-92.29                                            | 7.71-9.17   | 1.63-2.37                    | 85.47-87.28      | 12.72-14.53 | 3.11-4.09                    | 88.59-90.21                      | 9.79-11.41  | 3.13-4.11                    |                  |          |                              |                                           |                                              |
| > 30 days                 | 3,856                                                  | 323         | 82                           | 3,648            | 531         | 150                          | 3,860                            | 319         | 150                          | 4,179            | 28.70    |                              |                                           |                                              |
| %                         | 92.27                                                  | 7.73        | 1.96                         | 87.29            | 12.71       | 3.59                         | 92.37                            | 7.63        | 3.59                         | 100              |          |                              |                                           |                                              |
| 95% CI                    | 91.46-93.08                                            | 6.92-8.54   | 1.54-2.38                    | 86.28-88.30      | 11.70-13.72 | 3.03-4.15                    | 91.56-93.17                      | 6.83-8.44   | 3.03-4.15                    |                  |          |                              |                                           |                                              |
| Travel destination        |                                                        |             |                              |                  |             |                              |                                  |             |                              |                  |          |                              |                                           |                                              |
| Asia                      | 6,653                                                  | 617         | 151                          | 6,234            | 1,036       | 286                          | 6,555                            | 715         | 254                          | 7,270            | 49.93    |                              |                                           |                                              |
| %                         | 91.51                                                  | 8.49        | 2.08                         | 85.75            | 14.25       | 3.93                         | 90.17                            | 9.83        | 3.49                         | 100              |          |                              |                                           |                                              |
| 95% CI                    | 90.87-92.15                                            | 7.85-9.13   | 1.75-2.40                    | 84.95-86.55      | 13.45-15.05 | 3.49-4.38                    | 89.48-90.85                      | 9.15-10.52  | 3.07-3.92                    |                  |          |                              |                                           |                                              |
| Africa                    | 4,248                                                  | 326         | 84                           | 3,990            | 584         | 146                          | 4,070                            | 504         | 161                          | 4,574            | 31.42    |                              |                                           |                                              |
| %                         | 92.87                                                  | 7.13        | 1.84                         | 87.23            | 12.77       | 3.19                         | 88.98                            | 11.02       | 3.52                         | 100              |          |                              |                                           |                                              |
| 95% CI                    | 92.13-93.62                                            | 6.38-7.87   | 1.45-2.23                    | 86.27-88.20      | 11.80-13.73 | 2.68-3.70                    | 88.07-89.89                      | 10.11-11.93 | 2.99-4.05                    |                  |          |                              |                                           |                                              |
| Latin America             | 2,527                                                  | 188         | 39                           | 2,383            | 188         | 86                           | 2,474                            | 241         | 80                           | 2,715            | 18.65    |                              |                                           |                                              |
| %                         | 93.08                                                  | 6.92        | 1.44                         | 92.69            | 7.31        | 3.35                         | 91.12                            | 8.88        | 2.95                         | 100              |          |                              |                                           |                                              |
| 95% CI                    | 92.12-94.03                                            | 5.97-7.88   | 0.99-1.88                    | 91.68-93.69      | 6.31-8.32   | 2.65-4.04                    | 90.05-92.19                      | 7.81-9.95   | 2.31-3.58                    |                  |          |                              |                                           |                                              |
| Type of travel            |                                                        |             |                              |                  |             |                              |                                  |             |                              |                  |          |                              |                                           |                                              |
| Backpacker                | 7,222                                                  | 632         | 140                          | 6,827            | 1,027       | 266                          | 7,135                            | 719         | 232                          | 7,854            | 53.95    |                              |                                           |                                              |
| %                         | 91.95                                                  | 8.05        | 1.78                         | 86.92            | 13.08       | 3.39                         | 90.85                            | 9.15        | 2.95                         | 100              |          |                              |                                           |                                              |
| 95% CI                    | 91.35-92.55                                            | 7.45-8.65   | 1.49-2.08                    | 86.18-87.67      | 12.33-13.82 | 2.99-3.79                    | 90.21-91.48                      | 8.52-9.79   | 2.58-3.33                    |                  |          |                              |                                           |                                              |
| All-inclusive<br>traveler | 2,661                                                  | 215         | 60                           | 2,478            | 398         | 100                          | 2,506                            | 370         | 126                          | 2,876            | 19.75    |                              |                                           |                                              |
| %                         | 92.52                                                  | 7.48        | 2.09                         | 86.16            | 13.84       | 3.48                         | 87.13                            | 12.87       | 4.38                         | 100              |          |                              |                                           |                                              |
| 95% CI                    | 91.56-93.49                                            | 6.51-8.44   | 1.56-2.61                    | 84.90-87.42      | 12.58-15.10 | 2.81-4.15                    | 85.91-88.36                      | 11.64-14.09 | 3.63-5.13                    |                  |          |                              |                                           |                                              |
| Business traveler         | 1,638                                                  | 127         | 32                           | 1,638            | 127         | 32                           | 1,575                            | 190         | 67                           | 1,765            | 12.12    |                              |                                           |                                              |
| %                         | 92.80                                                  | 7.20        | 1.81                         | 92.80            | 7.20        | 1.81                         | 89.24                            | 10.76       | 3.80                         | 100              |          |                              |                                           |                                              |
| 95% CI                    | 91.60-94.01                                            | 5.99-8.40   | 1.19-2.44                    | 91.60-94.01      | 5.99-8.40   | 1.19-2.44                    | 87.79-90.68                      | 9.32-12.21  | 2.90-4.69                    |                  |          |                              |                                           |                                              |
| Other types<br>of travel  | 1,907                                                  | 157         | 42                           | 1,664            | 400         | 120                          | 1,883                            | 181         | 75                           | 2,064            | 14.18    |                              |                                           |                                              |
| %                         | 92.39                                                  | 7.61        | 2.03                         | 80.62            | 19.38       | 5.81                         | 91.23                            | 8.77        | 3.63                         | 100              |          |                              |                                           |                                              |
| 95% CI                    | 91.25-93.54                                            | 6.46-8.75   | 1.43-2.64                    | 78.91-82.33      | 17.67-21.09 | 4.80-6.82                    | 90.01-92.45                      | 7.55-9.99   | 2.83-4.44                    |                  |          |                              |                                           |                                              |
| Symptoms (only cases)     |                                                        |             |                              |                  |             |                              |                                  |             |                              |                  |          |                              |                                           |                                              |
| Diarrhea                  | 5,915                                                  | 454         | 83                           | 5,524            | 845         | 164                          | 5,854                            | 515         | 155                          | 6,369            | 43.75    |                              |                                           |                                              |
| %                         | 92.87                                                  | 7.13        | 1.30                         | 86.73            | 13.27       | 2.57                         | 91.91                            | 8.09        | 2.43                         | 100              |          |                              |                                           |                                              |
| 95% CI                    | 92.24-93.50                                            | 6.50-7.76   | 1.02-1.58                    | 85.90-87.57      | 12.43-14.10 | 2.19-2.96                    | 91.24-92.58                      | 7.42-8.76   | 2.06-2.81                    |                  |          |                              |                                           |                                              |
| Fever                     | 3,868                                                  | 570         | 174                          | 3,649            | 789         | 259                          | 3,806                            | 632         | 243                          | 4,438            | 30.48    |                              |                                           |                                              |
| %                         | 87.16                                                  | 12.84       | 3.92                         | 82.22            | 17.78       | 5.84                         | 85.76                            | 14.24       | 5.48                         | 100              |          |                              |                                           |                                              |
| 95% CI                    | 86.17-88.14                                            | 11.86-13.83 | 3.35-4.49                    | 81.10-83.35      | 16.65-18.90 | 5.15-6.53                    | 84.73-86.79                      | 13.21-15.27 | 4.81-6.14                    |                  |          |                              |                                           |                                              |

(continued)

SUPPLEMENTAL TABLE 1  
Continued

| Class                                  | Transferrases (EC 2)                                   |             |                           |                  |             |                           |                                  |             |                           |                  |          |                           | Proportion among cases or controls (%) |          |                           |
|----------------------------------------|--------------------------------------------------------|-------------|---------------------------|------------------|-------------|---------------------------|----------------------------------|-------------|---------------------------|------------------|----------|---------------------------|----------------------------------------|----------|---------------------------|
|                                        | Transferrases transferring nitrogenous groups (EC 2.6) |             |                           |                  |             |                           | Acyltransferases (EC 2.3)        |             |                           |                  |          |                           |                                        |          |                           |
|                                        | AST (EC 2.6.1.1)                                       |             |                           | ALT (EC 2.6.1.2) |             |                           | Aminoacyltransferases (EC 2.3.2) |             |                           | GGT (EC 2.3.2.2) |          |                           |                                        |          |                           |
| Subclass                               | Transferrases (EC 2)                                   |             |                           |                  |             |                           |                                  |             |                           |                  |          |                           | Total (%): Normal + elevated values    |          |                           |
| Sub-subclass                           | Transaminases (EC 2.6.1)                               |             |                           |                  |             |                           | Transferrases (EC 2.6.1.2)       |             |                           |                  |          |                           |                                        |          |                           |
| Enzyme                                 | Normal                                                 | Elevated    | More than 2-fold elevated | Normal           | Elevated    | More than 2-fold elevated | Normal                           | Elevated    | More than 2-fold elevated | Normal           | Elevated | More than 2-fold elevated | Normal                                 | Elevated | More than 2-fold elevated |
| Nausea                                 | 2,748                                                  | 247         | 54                        | 2,590            | 405         | 98                        | 2,765                            | 230         | 80                        | 2,995            | 20.57    |                           |                                        |          |                           |
| %                                      | 91.75                                                  | 8.25        | 1.80                      | 86.48            | 13.52       | 3.27                      | 92.32                            | 7.68        | 2.67                      | 100              |          |                           |                                        |          |                           |
| 95% CI                                 | 90.77-92.74                                            | 7.26-9.23   | 1.33-2.28                 | 85.25-87.70      | 12.30-14.75 | 2.63-3.91                 | 91.37-93.27                      | 6.73-8.63   | 2.09-3.25                 |                  |          |                           |                                        |          |                           |
| Skin disorders                         | 1,973                                                  | 177         | 40                        | 1,856            | 294         | 72                        | 1,893                            | 257         | 76                        | 2,150            | 14.77    |                           |                                        |          |                           |
| %                                      | 91.77                                                  | 8.23        | 1.86                      | 86.33            | 13.67       | 3.35                      | 88.05                            | 11.95       | 3.53                      | 100              |          |                           |                                        |          |                           |
| 95% CI                                 | 90.61-92.93                                            | 7.07-9.39   | 1.29-2.43                 | 84.87-87.78      | 12.22-15.13 | 2.59-4.11                 | 86.68-89.42                      | 10.58-13.32 | 2.75-4.32                 |                  |          |                           |                                        |          |                           |
| Arthralgia                             | 1,677                                                  | 203         | 56                        | 1,554            | 326         | 90                        | 1,611                            | 269         | 102                       | 1,880            | 12.91    |                           |                                        |          |                           |
| %                                      | 89.20                                                  | 10.80       | 2.98                      | 82.66            | 17.34       | 4.79                      | 85.69                            | 14.31       | 5.43                      | 100              |          |                           |                                        |          |                           |
| 95% CI                                 | 87.80-90.61                                            | 9.39-12.20  | 2.21-3.75                 | 80.95-84.37      | 15.63-19.05 | 3.82-5.75                 | 84.11-87.27                      | 12.73-15.89 | 4.40-6.45                 |                  |          |                           |                                        |          |                           |
| Viral infectious diseases (only cases) |                                                        |             |                           |                  |             |                           |                                  |             |                           |                  |          |                           |                                        |          |                           |
| Dengue fever                           | 141                                                    | 107         | 30                        | 161              | 87          | 40                        | 202                              | 46          | 15                        | 248              | 1.70     |                           |                                        |          |                           |
| %                                      | 56.85                                                  | 43.15       | 12.10                     | 64.92            | 35.08       | 16.13                     | 81.45                            | 18.55       | 6.05                      | 100              |          |                           |                                        |          |                           |
| 95% CI                                 | 50.69-63.02                                            | 36.98-49.31 | 8.04-16.16                | 58.98-70.86      | 29.14-41.02 | 11.55-20.71               | 76.61-86.29                      | 13.71-23.39 | 3.08-9.02                 |                  |          |                           |                                        |          |                           |
| Infectious mononucleosis               | 18                                                     | 33          | 24                        | 12               | 39          | 30                        | 15                               | 36          | 24                        | 51               | 0.35     |                           |                                        |          |                           |
| %                                      | 35.29                                                  | 64.71       | 47.06                     | 23.53            | 76.47       | 58.82                     | 29.41                            | 70.59       | 47.06                     | 100              |          |                           |                                        |          |                           |
| 95% CI                                 | 22.18-48.41                                            | 51.59-77.82 | 33.36-60.76               | 11.89-35.17      | 64.83-88.11 | 45.32-72.33               | 16.91-41.92                      | 58.08-83.09 | 33.36-60.76               |                  |          |                           |                                        |          |                           |
| CMV inf.                               | 6                                                      | 20          | 12                        | 5                | 21          | 17                        | 11                               | 15          | 8                         | 26               | 0.18     |                           |                                        |          |                           |
| %                                      | 23.08                                                  | 76.92       | 46.15                     | 19.23            | 80.77       | 65.38                     | 42.31                            | 57.69       | 30.77                     | 100              |          |                           |                                        |          |                           |
| 95% CI                                 | 6.88-39.27                                             | 60.73-93.12 | 26.99-65.32               | 4.08-34.38       | 65.62-95.92 | 47.10-83.67               | 23.32-61.30                      | 38.70-76.68 | 13.03-48.51               |                  |          |                           |                                        |          |                           |
| Herpes simplex                         | 17                                                     | 3           | 1                         | 17               | 3           | 1                         | 17                               | 3           | 1                         | 20               | 0.14     |                           |                                        |          |                           |
| %                                      | 85.00                                                  | 15.00       | 5.00                      | 85.00            | 15.00       | 5.00                      | 85.00                            | 15.00       | 5.00                      | 100              |          |                           |                                        |          |                           |
| 95% CI                                 | 69.35-100                                              | 0-30.65     | 0-14.55                   | 69.35-100        | 0-30.65     | 0-14.55                   | 69.35-100                        | 0-30.65     | 0-14.55                   |                  |          |                           |                                        |          |                           |
| Chikungunya                            | 14                                                     | 4           | 2                         | 13               | 5           | 3                         | 14                               | 4           | 1                         | 18               | 0.12     |                           |                                        |          |                           |
| %                                      | 77.78                                                  | 22.22       | 11.11                     | 72.22            | 27.78       | 16.67                     | 77.78                            | 22.22       | 5.56                      | 100              |          |                           |                                        |          |                           |
| 95% CI                                 | 58.57-96.98                                            | 3.02-41.43  | 0-25.63                   | 51.53-92.91      | 7.09-48.47  | 0-33.88                   | 58.57-96.98                      | 3.02-41.43  | 0-16.14                   |                  |          |                           |                                        |          |                           |
| Chronic hepatitis C                    | 4                                                      | 8           | 0                         | 4                | 8           | 3                         | 8                                | 4           | 2                         | 12               | 0.08     |                           |                                        |          |                           |
| %                                      | 33.33                                                  | 66.67       | 0                         | 33.33            | 66.67       | 25.00                     | 66.67                            | 33.33       | 16.67                     | 100              |          |                           |                                        |          |                           |
| 95% CI                                 | 6.66-60.01                                             | 39.99-93.34 | NA                        | 6.66-60.01       | 39.99-93.34 | 0.50-49.50                | 39.99-93.34                      | 6.66-60.01  | 0-37.75                   |                  |          |                           |                                        |          |                           |
| Herpes zoster                          | 11                                                     | 0           | 0                         | 11               | 0           | 0                         | 11                               | 0           | 0                         | 11               | 0.08     |                           |                                        |          |                           |
| %                                      | 100                                                    | 0           | 0                         | 100              | 0           | 0                         | 100                              | 0           | 0                         | 100              |          |                           |                                        |          |                           |
| 95% CI                                 | NA                                                     | NA          | NA                        | NA               | NA          | NA                        | NA                               | NA          | NA                        |                  |          |                           |                                        |          |                           |
| Asymptomatic HIV inf.                  | 10                                                     | 4           | 0                         | 8                | 3           | 1                         | 8                                | 3           | 1                         | 11               | 0.08     |                           |                                        |          |                           |
| %                                      | 90.91                                                  | 9.09        | 0                         | 72.73            | 27.27       | 9.09                      | 72.73                            | 27.27       | 9.09                      | 100              |          |                           |                                        |          |                           |
| 95% CI                                 | 73.92-100                                              | 0-26.08     | NA                        | 46.41-99.05      | 0.95-53.59  | 0-26.08                   | 46.41-99.05                      | 0.95-53.59  | 0-26.08                   |                  |          |                           |                                        |          |                           |
| Acute HIV inf.                         | 5                                                      | 3           | 0                         | 5                | 3           | 0                         | 6                                | 2           | 0                         | 8                | 0.05     |                           |                                        |          |                           |
| %                                      | 62.50                                                  | 37.50       | 0                         | 62.50            | 37.50       | 0                         | 75.00                            | 25.00       | 0                         | 100              |          |                           |                                        |          |                           |
| 95% CI                                 | 28.65-96.05                                            | 3.95-71.05  | NA                        | 28.65-96.05      | 3.95-71.05  | NA                        | 44.99-100                        | 0-55.01     | NA                        |                  |          |                           |                                        |          |                           |
| Hepatitis A                            | 0                                                      | 8           | 8                         | 0                | 8           | 8                         | 0                                | 8           | 6                         | 8                | 0.05     |                           |                                        |          |                           |
| %                                      | 0                                                      | 100         | 100                       | 0                | 100         | 100                       | 0                                | 100         | 75.00                     | 100              |          |                           |                                        |          |                           |
| 95% CI                                 | NA                                                     | NA          | NA                        | NA               | NA          | NA                        | NA                               | NA          | 44.99-100                 |                  |          |                           |                                        |          |                           |

(continued)

Supplemental Table 1  
Continued

| Class                                             | Transferrases (EC 2)                                   |             |                              |             |                          |                              |             |             |                                  |             |             |                              | Total (%):<br>Normal +<br>elevated values | Proportion<br>among cases or<br>controls (%) |
|---------------------------------------------------|--------------------------------------------------------|-------------|------------------------------|-------------|--------------------------|------------------------------|-------------|-------------|----------------------------------|-------------|-------------|------------------------------|-------------------------------------------|----------------------------------------------|
|                                                   | Transferrases transferring nitrogenous groups (EC 2.6) |             |                              |             | Transaminases (EC 2.6.1) |                              |             |             | Acyltransferases (EC 2.3)        |             |             |                              |                                           |                                              |
| Subclass                                          | AST (EC 2.6.1.1)                                       |             |                              |             | ALT (EC 2.6.1.2)         |                              |             |             | Aminoacyltransferases (EC 2.3.2) |             |             |                              | GGT (EC 2.3.2.2)                          |                                              |
| Sub-subclass                                      | Normal                                                 | Elevated    | More than<br>2-fold elevated | Normal      | Elevated                 | More than<br>2-fold elevated | Normal      | Elevated    | More than<br>2-fold elevated     | Normal      | Elevated    | More than<br>2-fold elevated |                                           |                                              |
| Enzyme                                            | Values                                                 | Values      | Values                       | Values      | Values                   | Values                       | Values      | Values      | Values                           | Values      | Values      | Values                       |                                           |                                              |
| <b>Bacterial infectious diseases (only cases)</b> |                                                        |             |                              |             |                          |                              |             |             |                                  |             |             |                              |                                           |                                              |
| <i>Campylobacter</i> inf.                         | 514                                                    | 39          | 5                            | 491         | 62                       | 15                           | 514         | 39          | 7                                | 514         | 39          | 7                            | 553                                       | 3.80                                         |
| 95% CI                                            | 92.95                                                  | 7.05        | 0.90                         | 88.79       | 11.21                    | 2.71                         | 92.95       | 7.05        | 1.27                             | 92.95       | 7.05        | 1.27                         | 100                                       |                                              |
| Shigellosis                                       | 191                                                    | 11          | 2                            | 184         | 18                       | 3                            | 191         | 11          | 4                                | 191         | 11          | 4                            | 202                                       | 1.39                                         |
| 95% CI                                            | 94.55                                                  | 5.45        | 0.99                         | 91.09       | 8.91                     | 1.49                         | 94.55       | 5.45        | 1.98                             | 94.55       | 5.45        | 1.98                         | 100                                       |                                              |
| Salmonellosis                                     | 174                                                    | 25          | 7                            | 171         | 28                       | 9                            | 183         | 16          | 7                                | 183         | 16          | 7                            | 199                                       | 1.37                                         |
| 95% CI                                            | 87.44                                                  | 12.56       | 3.52                         | 85.93       | 14.07                    | 4.52                         | 91.96       | 8.04        | 3.52                             | 91.96       | 8.04        | 3.52                         | 100                                       |                                              |
| Rickettsiosis                                     | 56                                                     | 14          | 3                            | 53          | 17                       | 3                            | 56          | 14          | 5                                | 56          | 14          | 5                            | 70                                        | 0.48                                         |
| 95% CI                                            | 82.83-92.04                                            | 7.96-17.17  | 0.96-6.08                    | 81.10-90.76 | 9.24-18.90               | 1.64-7.41                    | 88.18-95.74 | 4.26-11.82  | 0.96-6.08                        | 88.18-95.74 | 4.26-11.82  | 0.96-6.08                    | 100                                       |                                              |
| Typhoid fever                                     | 80.00                                                  | 20.00       | 4.29                         | 75.71       | 24.29                    | 4.29                         | 80.00       | 20.00       | 7.14                             | 80.00       | 20.00       | 7.14                         | 100                                       |                                              |
| 95% CI                                            | 70.63-89.37                                            | 10.63-29.37 | 0-9.03                       | 65.67-85.76 | 14.24-34.33              | 0-9.03                       | 70.63-89.37 | 10.63-29.37 | 1.11-13.18                       | 70.63-89.37 | 10.63-29.37 | 1.11-13.18                   | 14                                        | 0.10                                         |
| Paratyphoid fever                                 | 7                                                      | 7           | 0                            | 7           | 7                        | 1                            | 13          | 1           | 0                                | 13          | 1           | 0                            | 100                                       |                                              |
| 95% CI                                            | 50.00                                                  | 50.00       | 0                            | 50.00       | 50.00                    | 7.14                         | 92.86       | 7.14        | 0                                | 92.86       | 7.14        | 0                            | 100                                       |                                              |
| Noninv.                                           | 23.81-76.19                                            | 23.81-76.19 | NA                           | 23.81-76.19 | 23.81-76.19              | 0-20.63                      | 79.37-100   | 0-20.63     | NA                               | 79.37-100   | 0-20.63     | NA                           | 12                                        | 0.08                                         |
| 95% CI                                            | 58.33                                                  | 41.67       | 16.67                        | 58.33       | 41.67                    | 25.00                        | 83.33       | 16.67       | 2                                | 83.33       | 16.67       | 2                            | 100                                       |                                              |
| Protozoan infectious diseases (only cases)        |                                                        |             |                              |             |                          |                              |             |             |                                  |             |             |                              |                                           |                                              |
| <i>Blastocystis hominis</i> inf.                  | 803                                                    | 58          | 7                            | 762         | 99                       | 18                           | 811         | 50          | 8                                | 811         | 50          | 8                            | 861                                       | 5.91                                         |
| 95% CI                                            | 93.26                                                  | 6.74        | 0.81                         | 88.50       | 11.50                    | 2.09                         | 94.19       | 5.81        | 0.93                             | 94.19       | 5.81        | 0.93                         | 100                                       |                                              |
| Giardiasis                                        | 592                                                    | 68          | 6                            | 527         | 133                      | 21                           | 632         | 28          | 9                                | 632         | 28          | 9                            | 660                                       | 4.53                                         |
| 95% CI                                            | 91.59-94.94                                            | 5.06-8.41   | 0.21-1.41                    | 86.37-90.63 | 9.37-13.63               | 1.13-3.05                    | 92.63-95.76 | 4.24-7.37   | 0.29-1.57                        | 92.63-95.76 | 4.24-7.37   | 0.29-1.57                    | 100                                       |                                              |
| Noninv.                                           | 89.70                                                  | 10.30       | 0.91                         | 79.85       | 20.15                    | 3.18                         | 95.76       | 4.24        | 1.36                             | 95.76       | 4.24        | 1.36                         | 100                                       |                                              |
| 95% CI                                            | 87.38-92.02                                            | 7.98-12.62  | 0.18-1.63                    | 76.79-82.91 | 17.09-23.21              | 1.84-4.52                    | 94.22-97.30 | 2.70-5.78   | 0.48-2.25                        | 94.22-97.30 | 2.70-5.78   | 0.48-2.25                    | 115                                       | 0.79                                         |
| <i>Entamoeba</i> inf.                             | 110                                                    | 5           | 0                            | 99          | 16                       | 1                            | 110         | 5           | 1                                | 110         | 5           | 1                            | 100                                       |                                              |
| 95% CI                                            | 94.78                                                  | 5.22        | 0                            | 86.09       | 13.91                    | 1.74                         | 95.65       | 4.35        | 0.87                             | 95.65       | 4.35        | 0.87                         | 100                                       |                                              |
| Malaria                                           | 74                                                     | 19          | 11                           | 68          | 25                       | 10                           | 76          | 17          | 4                                | 76          | 17          | 4                            | 93                                        | 0.64                                         |
| 95% CI                                            | 90.72-98.85                                            | 1.15-9.28   | NA                           | 79.76-92.41 | 7.59-20.24               | 0-4.13                       | 91.92-93.8  | 0.62-8.08   | 0-2.57                           | 91.92-93.8  | 0.62-8.08   | 0-2.57                       | 100                                       |                                              |
| Cryptosporidiosis                                 | 44                                                     | 8           | 1                            | 39          | 13                       | 2                            | 50          | 2           | 0                                | 50          | 2           | 0                            | 52                                        | 0.36                                         |
| 95% CI                                            | 71.38-87.76                                            | 12.24-28.62 | 5.26-18.39                   | 64.11-82.13 | 17.87-35.89              | 4.46-17.05                   | 73.87-89.58 | 10.42-26.13 | 0.18-8.42                        | 73.87-89.58 | 10.42-26.13 | 0.18-8.42                    | 100                                       |                                              |
| Cyclosporiasis                                    | 84.62                                                  | 15.38       | 1.92                         | 75.00       | 25.00                    | 3.85                         | 96.15       | 3.85        | 0                                | 96.15       | 3.85        | 0                            | 100                                       |                                              |
| 95% CI                                            | 74.81-94.42                                            | 5.58-25.19  | 0-5.66                       | 63.23-86.77 | 13.23-36.77              | 0-9.07                       | 90.93-100   | 0-9.07      | NA                               | 90.93-100   | 0-9.07      | NA                           | 38                                        | 0.26                                         |
| 95% CI                                            | 55.26                                                  | 44.74       | 5.26                         | 34.21       | 65.79                    | 15.79                        | 92.11       | 7.89        | 2.63                             | 92.11       | 7.89        | 2.63                         | 100                                       |                                              |
| 95% CI                                            | 39.45-71.07)                                           | 28.93-60.55 | 0-12.36                      | 19.13-49.29 | 50.71-80.87              | 4.20-27.38                   | 83.53-100   | 0-16.47     | 0-7.72                           | 83.53-100   | 0-16.47     | 0-7.72                       | 100                                       |                                              |

(continued)

SUPPLEMENTAL TABLE 1  
Continued

| Class                                          | Transferrases (EC 2)                                   |             |                              |                  |             |                              |                                  |            |                              |                  |            |                              | Total (%):<br>Normal +<br>elevated values | Proportion<br>among cases or<br>controls (%) |       |
|------------------------------------------------|--------------------------------------------------------|-------------|------------------------------|------------------|-------------|------------------------------|----------------------------------|------------|------------------------------|------------------|------------|------------------------------|-------------------------------------------|----------------------------------------------|-------|
|                                                | Transferrases transferring nitrogenous groups (EC 2.6) |             |                              |                  |             |                              | Acyltransferases (EC 2.3)        |            |                              |                  |            |                              |                                           |                                              |       |
|                                                | Transaminases (EC 2.6.1)                               |             |                              | ALT (EC 2.6.1.2) |             |                              | Aminoacyltransferases (EC 2.3.2) |            |                              | GGT (EC 2.3.2.2) |            |                              |                                           |                                              |       |
|                                                | Normal                                                 | Elevated    | More than<br>2-fold elevated | Normal           | Elevated    | More than<br>2-fold elevated | Normal                           | Elevated   | More than<br>2-fold elevated | Normal           | Elevated   | More than<br>2-fold elevated |                                           |                                              |       |
| Enzyme                                         | Values                                                 |             |                              |                  |             |                              |                                  |            |                              |                  |            |                              |                                           |                                              |       |
| <i>Dientamoeba fragilis</i> inf. %             | 17                                                     | 0           | 0                            | 17               | 0           | 0                            | 17                               | 0          | 0                            | 0                | 0          | 17                           | 0                                         | 17                                           | 0.12  |
| 95% CI                                         | 100                                                    | 0           | 0                            | 100              | 0           | 0                            | 100                              | 0          | 0                            | 0                | 0          | 100                          | 0                                         | 100                                          |       |
| Cutaneous leishmaniasis %                      | NA                                                     | NA          | NA                           | NA               | NA          | NA                           | NA                               | NA         | NA                           | NA               | NA         | NA                           | NA                                        | NA                                           | 0.09  |
| 95% CI                                         | 12                                                     | 1           | 0                            | 11               | 2           | 0                            | 11                               | 2          | 0                            | 0                | 1          | 11                           | 2                                         | 13                                           |       |
| Invasive <i>Entamoeba</i> inf. %               | 92.31                                                  | 7.69        | 0                            | 84.62            | 15.38       | 0                            | 84.62                            | 15.38      | 0                            | 0                | 7.69       | 84.62                        | 15.38                                     | 100                                          |       |
| 95% CI                                         | 77.82–100                                              | 0–22.18     | NA                           | 65.00–100        | 0–35.00     | NA                           | 65.00–100                        | 0–35.00    | NA                           | 0–22.18          | 0–22.18    | 65.00–100                    | 0–35.00                                   | 100                                          |       |
|                                                | 8                                                      | 2           | 0                            | 8                | 2           | 0                            | 8                                | 2          | 0                            | 2                | 0          | 6                            | 4                                         | 10                                           | 0.07  |
| 95% CI                                         | 80.00                                                  | 20.00       | 0                            | 80.00            | 20.00       | 0                            | 80.00                            | 20.00      | 0                            | 20.00            | 20.00      | 60.00                        | 40.00                                     | 100                                          |       |
| Trichomoniasis %                               | 55.21–100                                              | 0–44.79     | NA                           | 55.21–100        | 0–44.79     | 0–44.79                      | 29.64–90.36                      | 9.64–70.36 | 0–44.79                      | 0–44.79          | 0–44.79    | 29.64–90.36                  | 9.64–70.36                                | 100                                          |       |
| 95% CI                                         | 9                                                      | 1           | 0                            | 9                | 1           | 0                            | 10                               | 0          | 0                            | 0                | 0          | 10                           | 0                                         | 10                                           | 0.07  |
| Helminthic infectious diseases (only cases)    | 90.00                                                  | 10.00       | 0                            | 90.00            | 10.00       | 0                            | 100                              | 0          | 0                            | 0                | 0          | 100                          | 0                                         | 100                                          |       |
| Cutaneous larva migrans %                      | 71.41–100                                              | 0–28.59     | NA                           | 71.41–100        | 0–28.59     | NA                           | NA                               | NA         | NA                           | NA               | NA         | NA                           | NA                                        | NA                                           |       |
| 95% CI                                         | 71                                                     | 2           | 0                            | 66               | 7           | 0                            | 70                               | 3          | 1                            | 1                | 1          | 73                           | 3                                         | 73                                           | 0.50  |
| Hookworm* inf. %                               | 97.26                                                  | 2.74        | 0                            | 90.41            | 9.59        | 0                            | 95.89                            | 4.11       | 1.37                         | 1.37             | 1.37       | 95.89                        | 4.11                                      | 100                                          |       |
| 95% CI                                         | 93.52–100                                              | 0–6.48      | NA                           | 83.66–97.17      | 2.83–16.34  | NA                           | 91.34–100                        | 0–8.66     | 0–4.04                       | 0–4.04           | 0–4.04     | 91.34–100                    | 0–8.66                                    | 100                                          |       |
| Schistosomiasis %                              | 46                                                     | 3           | 1                            | 42               | 7           | 3                            | 40                               | 9          | 4                            | 4                | 4          | 40                           | 9                                         | 49                                           | 0.34  |
| 95% CI                                         | 93.88                                                  | 6.12        | 2.04                         | 85.71            | 14.29       | 6.12                         | 81.63                            | 18.37      | 8.16                         | 8.16             | 8.16       | 81.63                        | 18.37                                     | 100                                          |       |
| Hookworm* inf. %                               | 87.16–100                                              | 0–12.84     | 0–6.00                       | 75.92–95.51      | 4.49–24.08  | 0–12.84                      | 70.79–92.47                      | 7.53–29.21 | 0.50–15.83                   | 0.50–15.83       | 0.50–15.83 | 70.79–92.47                  | 7.53–29.21                                | 100                                          |       |
| 95% CI                                         | 18                                                     | 0           | 0                            | 15               | 3           | 1                            | 17                               | 1          | 1                            | 1                | 1          | 17                           | 1                                         | 18                                           | 0.12  |
| Trichuriasis %                                 | 100                                                    | 0           | 0                            | 83.33            | 16.67       | 5.56                         | 94.44                            | 5.56       | 5.56                         | 5.56             | 5.56       | 94.44                        | 5.56                                      | 100                                          |       |
| 95% CI                                         | NA                                                     | NA          | NA                           | 66.12–100        | 0–33.88     | 0–16.14                      | 83.86–100                        | 0–16.14    | 0–16.14                      | 0–16.14          | 0–16.14    | 83.86–100                    | 0–16.14                                   | 100                                          |       |
| Ascariasis %                                   | 17                                                     | 1           | 1                            | 13               | 5           | 1                            | 14                               | 4          | 3                            | 3                | 3          | 14                           | 4                                         | 18                                           | 0.12  |
| 95% CI                                         | 94.44                                                  | 5.56        | 5.56                         | 72.22            | 27.78       | 5.56                         | 77.78                            | 22.22      | 16.67                        | 16.67            | 16.67      | 77.78                        | 22.22                                     | 100                                          |       |
| Oxyuriasis %                                   | 83.86–100                                              | 0–16.14     | 0–16.14                      | 51.53–92.91      | 7.09–48.47  | 0–16.14                      | 58.57–96.98                      | 3.02–41.43 | 0–33.88                      | 0–33.88          | 0–33.88    | 58.57–96.98                  | 3.02–41.43                                | 100                                          |       |
| 95% CI                                         | 14                                                     | 0           | 0                            | 14               | 0           | 0                            | 14                               | 0          | 0                            | 0                | 0          | 14                           | 0                                         | 14                                           | 0.10  |
| Ectoparasitic infectious diseases (only cases) | 100                                                    | 0           | 0                            | 100              | 0           | 0                            | 100                              | 0          | 0                            | 0                | 0          | 100                          | 0                                         | 100                                          |       |
| Scabies %                                      | NA                                                     | NA          | NA                           | NA               | NA          | NA                           | NA                               | NA         | NA                           | NA               | NA         | NA                           | NA                                        | NA                                           | 0.08  |
| 95% CI                                         | 12                                                     | 0           | 0                            | 11               | 1           | 0                            | 11                               | 1          | 0                            | 0                | 0          | 11                           | 1                                         | 12                                           |       |
| Summary                                        | 100                                                    | 0           | 0                            | 91.67            | 8.33        | 0                            | 91.67                            | 8.33       | 0                            | 0                | 0          | 91.67                        | 8.33                                      | 100                                          |       |
| Total of 33 IDs %                              | 85.46–87.71                                            | 12.29–14.54 | 2.96–4.19                    | 80.16–82.73      | 17.27–19.84 | 4.96–6.50                    | 89.56–91.49                      | 8.51–10.44 | 2.73–3.91                    | 2.73–3.91        | 2.73–3.91  | 89.56–91.49                  | 8.51–10.44                                | 100                                          |       |
| 95% CI                                         | 3,052                                                  | 473         | 126                          | 2,871            | 654         | 202                          | 3,191                            | 334        | 117                          | 117              | 117        | 3,191                        | 334                                       | 3,525                                        | 24.21 |
|                                                | 86.58                                                  | 13.42       | 3.57                         | 81.45            | 18.55       | 5.73                         | 90.52                            | 9.48       | 3.32                         | 3.32             | 3.32       | 90.52                        | 9.48                                      | 100                                          |       |
| 95% CI                                         | 85.46–87.71                                            | 12.29–14.54 | 2.96–4.19                    | 80.16–82.73      | 17.27–19.84 | 4.96–6.50                    | 89.56–91.49                      | 8.51–10.44 | 2.73–3.91                    | 2.73–3.91        | 2.73–3.91  | 89.56–91.49                  | 8.51–10.44                                | 100                                          |       |

ALT = alanine transaminase; AST = aspartate transaminase; CI = confidence interval; CMV = cytomegalovirus; EC = Enzyme Commission number; GGT = gamma-glutamyl transferase; HIV = human immunodeficiency virus; inf. = infection; noninv. = non-invasive; NA = not applicable; y = years. In the present controlled cross-sectional study, 1,536 healthy Germans without having recently traveled to the tropics and subtropics served as controls.  
\* *Ancylostoma* spp.
